# Supplementary material for: Activating self-supported NiPd electrodes by laser-direct-writing for efficient hydrogen evolution reaction
Source: Royal Society of Chemistry journal article supplement (doi:10.1039/d3qm00439b), 2023-01-01
Supplement: d3qm00439b1.pdf [file d3qm00439b1.pdf]

## *Supplementary Information*

### **Activating self-supported NiPd electrode by laser-direct-writing for efficient hydrogen evolution reaction**

Zihan Zhou, Liyang Xiao, Jun Zhao, Miao Zhou, Jingtong Zhang, Xiwen Du, Jing Yang\*

*Institute of New-Energy Materials, Key Laboratory of Advanced Ceramics and Machining  
Technology of Ministry of Education, School of Materials Science and Engineering, Tianjin  
University, Tianjin 300072, China.*

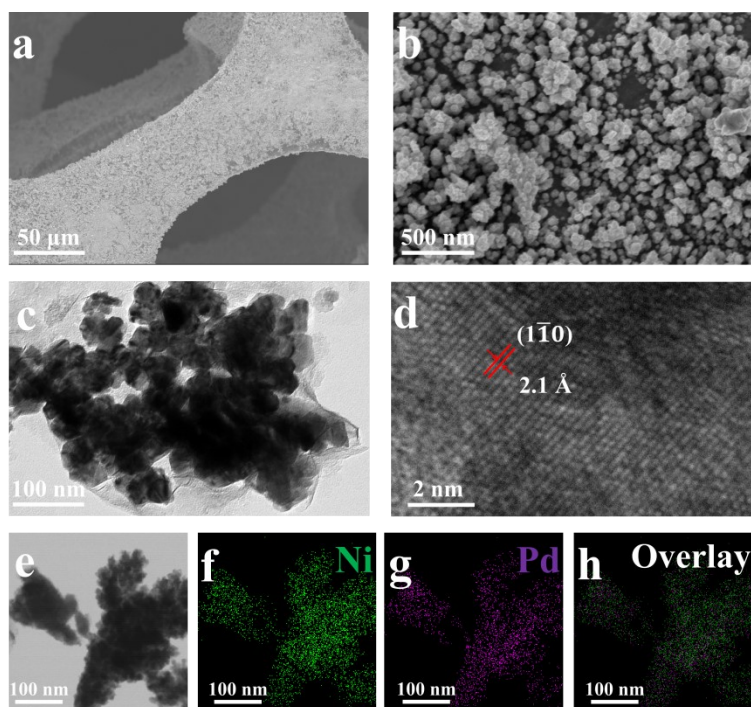

**Supplementary Figure 1.** **a-b** SEM images of the D-Ni<sub>3.5</sub>Pd/NF electrode. **c** TEM image of the D-Ni<sub>3.5</sub>Pd nanoparticles removed from the D-Ni<sub>3.5</sub>Pd/NF electrode by scraping off. **d** HR-TEM image of one D-Ni<sub>3.5</sub>Pd nanoparticle. **e** STEM image and **f-h** elemental mapping images of the D-Ni<sub>3.5</sub>Pd nanoparticles.

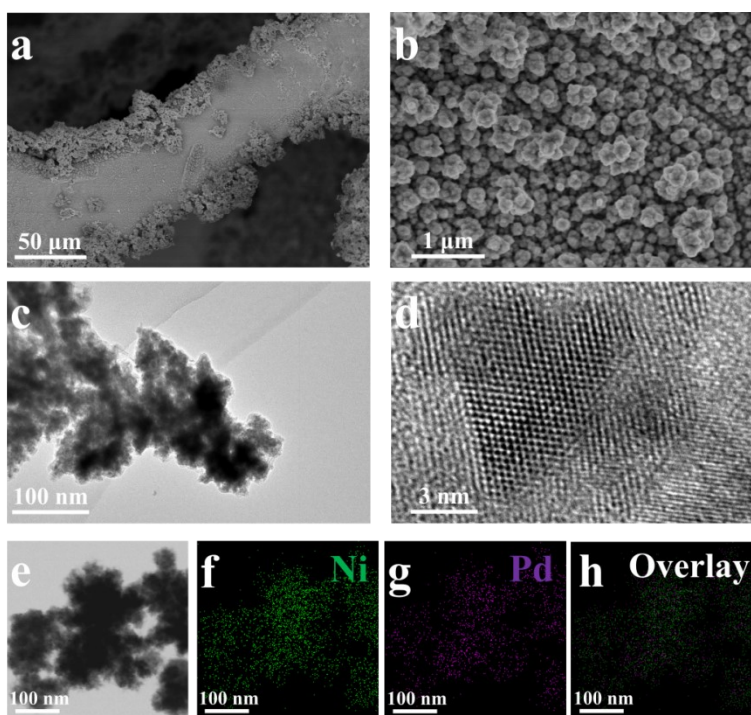

**Supplementary Figure 2.** **a-b** SEM images of the Ni<sub>3.5</sub>Pd/NF electrode. **c** TEM image of the Ni<sub>3.5</sub>Pd nanoparticles removed from the Ni<sub>3.5</sub>Pd/NF electrode by ultrasonication. **d** HR-TEM image of one Ni<sub>3.5</sub>Pd nanoparticle. **e** STEM image and **f-h** elemental mapping images of the Ni<sub>3.5</sub>Pd nanoparticles.

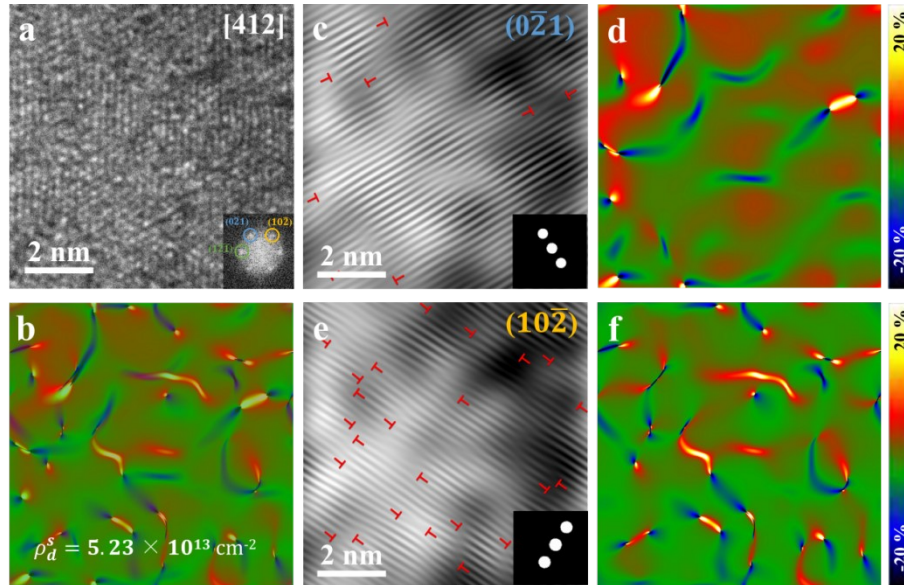

**Supplementary Figure 3.** **a** HR-TEM image of the D-Ni<sub>3.5</sub>Pd nanoparticles (removed from the D-Ni<sub>3.5</sub>Pd/NF electrode by ultrasonication) along [412] zone axis and corresponding electron diffraction pattern by performing FFT on **(a)** ; **b** An overlay of strain components  $\varepsilon_{xx}$  and  $\varepsilon_{yy}$ , superimposed with the HR-TEM image, suggesting a high dislocation density of  $\rho_d^s = 5.23 \times 10^{13} \text{ cm}^{-2}$  on (412) plane. **c** IFFT image corresponding to diffraction spot  $0\bar{2}1$ , showing the  $(0\bar{2}1)$  plane containing edge dislocations marked with symbol  $\perp$ . **d** Contour plot of the strain component  $\varepsilon_{xx}$  by GPA analysis on **(c)**. The color legend represents different strain, *i.e.*, green to dark blue relates to compressive strain and red to bright yellow corresponds to tensile strain. **e** IFFT image corresponding to diffraction spot  $10\bar{2}$ , showing the  $(10\bar{2})$  plane containing edge dislocations marked with symbol  $\perp$ . **h** Contour plot of the strain component  $\varepsilon_{yy}$  by GPA analysis on **(e)**.

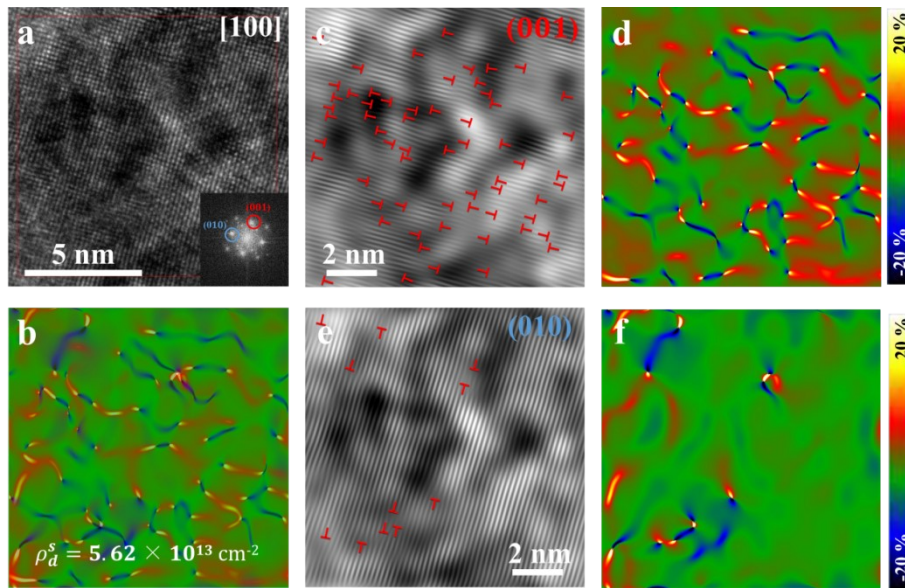

**Supplementary Figure 4.** **a** HR-TEM image of the D-Ni<sub>3.5</sub>Pd nanoparticles (removed from the D-Ni<sub>3.5</sub>Pd/NF electrode by ultrasonication) along [100] zone axis and corresponding electron diffraction pattern by performing FFT on **a** ; **b** An overlay of strain components  $\varepsilon_{xx}$  and  $\varepsilon_{yy}$ , superimposed with the HR-TEM image, suggesting a high dislocation density of  $\rho_d^s = 5.62 \times 10^{13} \text{ cm}^{-2}$  on (100) plane. **c** IFFT image corresponding to diffraction spot 001, showing the (001) plane containing edge dislocations marked with symbol  $\perp$ . **d** Contour plot of the strain component  $\varepsilon_{xx}$  by GPA analysis on (c). The color legend represents different strain, *i.e.*, green to dark blue relates to compressive strain and red to bright yellow corresponds to tensile strain. **e** IFFT image corresponding to diffraction spot 010, showing the (010) plane containing edge dislocations marked with symbol  $\perp$ . **f** Contour plot of the strain component  $\varepsilon_{yy}$  by GPA analysis on (e).

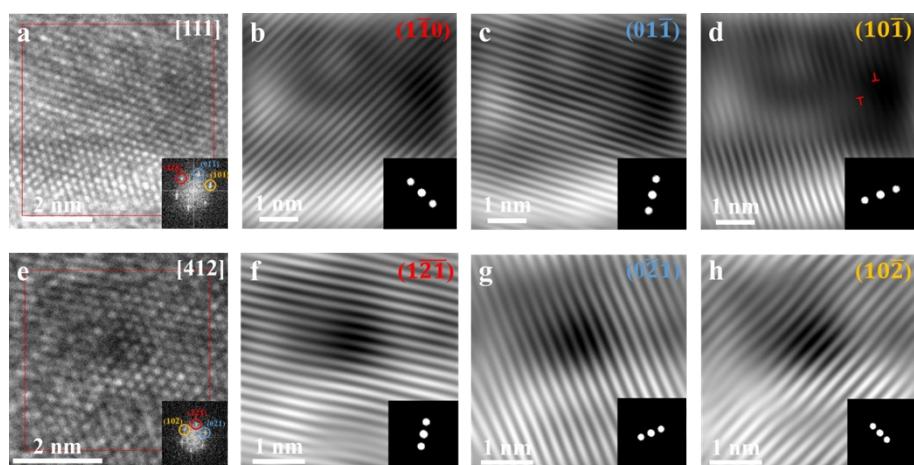

**Supplementary Figure 5.** **a** HR-TEM images and corresponding FFT image of the  $\text{Ni}_{3.5}\text{Pd}$  nanoparticles along the crystal zone axis of  $[111]$ . **b-d** IFFT images corresponding to diffraction spots  $1\bar{1}0$ ,  $01\bar{1}$ , and  $10\bar{1}$ , respectively, showing the  $(1\bar{1}0)$ ,  $(01\bar{1})$  and  $(10\bar{1})$  planes containing almost no defects. **e** HR-TEM images and corresponding FFT image of the  $\text{Ni}_{3.5}\text{Pd}$  nanoparticles along the crystal zone axis of  $[412]$ . **f-h** IFFT images corresponding to diffraction spots  $1\bar{2}1$ ,  $0\bar{2}1$ , and  $10\bar{2}$ , respectively, showing the  $(1\bar{2}1)$ ,  $(0\bar{2}1)$  and  $(10\bar{2})$  planes containing no defects.

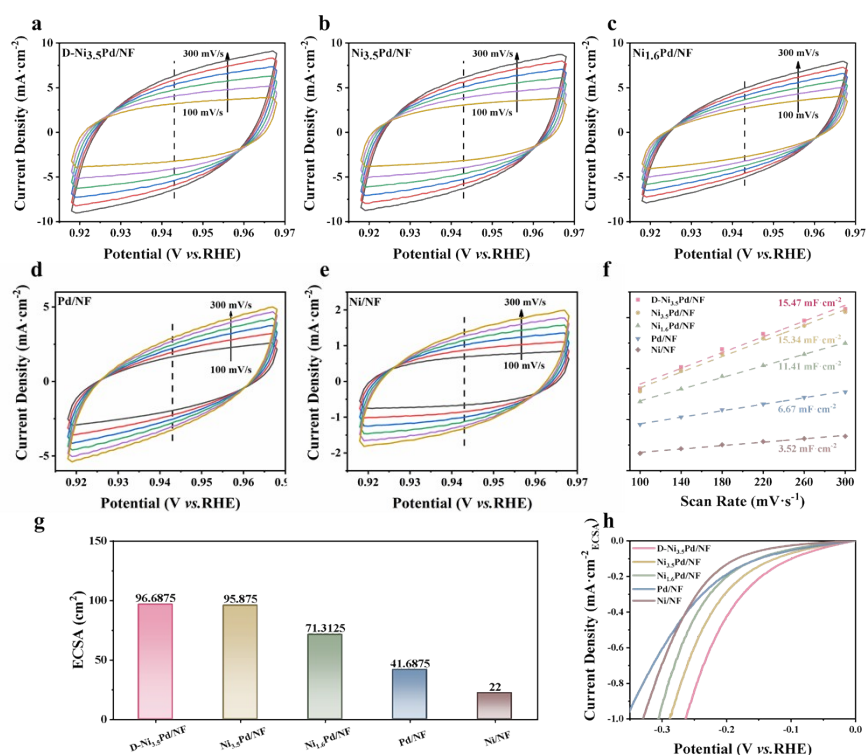

**Supplementary Figure 6.** Cyclic voltammograms at different scan rate in the region of  $-0.91$  to  $-0.97$  mV vs. Hg/HgO in  $1 \text{ mol L}^{-1}$  KOH for **a** D- $\text{Ni}_{3.5}\text{Pd}/\text{NF}$ , **b**  $\text{Ni}_{3.5}\text{Pd}/\text{NF}$ , **c**  $\text{Ni}_{1.6}\text{Pd}/\text{NF}$ , **d**  $\text{Pd}/\text{NF}$  and **e** pure Ni foam electrodes. **f** Current density-scan rate curve for ECSA calculation. **g** ECSA of above electrodes. **h** Polarization curves after ECSA normalization of these electrodes.

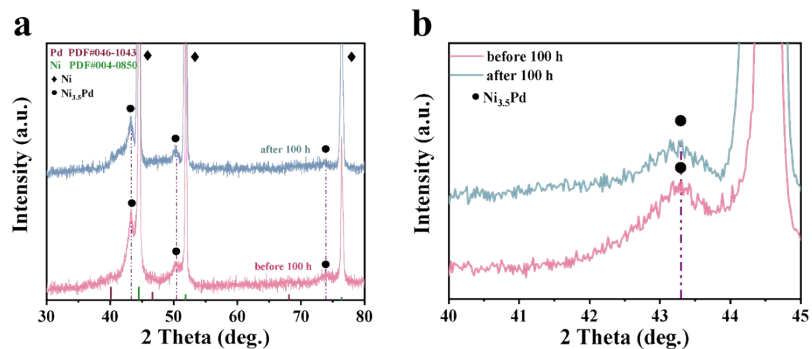

**Supplementary Figure 7.** **a** XRD patterns and **b** enlarged patterns in the range between 40° to 45° of the D-Ni<sub>3.5</sub>Pd/NF electrode before or after electrochemical stability test.

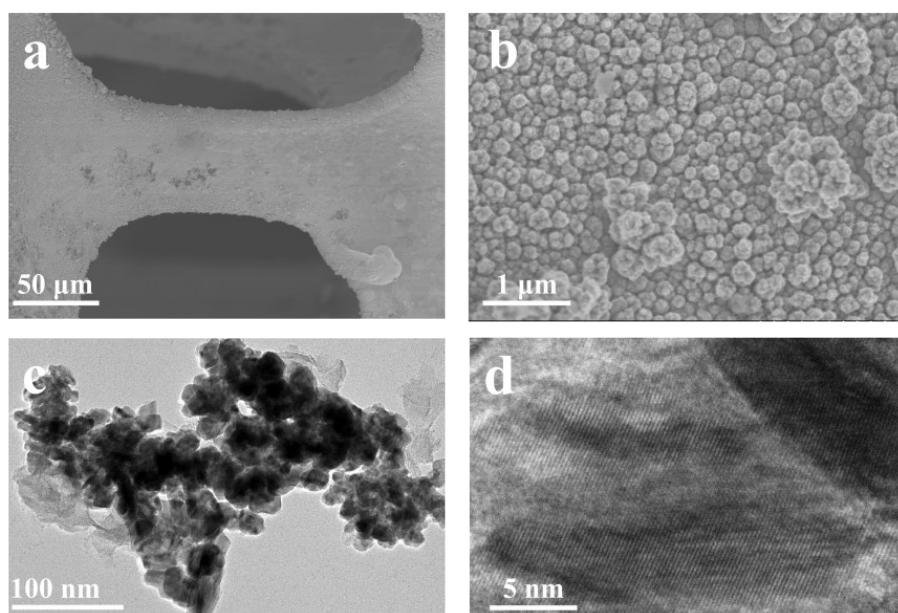

**Supplementary Figure 8.** **a-b** SEM images of the D-Ni<sub>3.5</sub>Pd/NF electrode after long-term test. **c** TEM image of the D-Ni<sub>3.5</sub>Pd nanoparticles removed from the D-Ni<sub>3.5</sub>Pd/NF electrode after long-term test. **d** HR-TEM image of one D-Ni<sub>3.5</sub>Pd nanoparticle after long-term test.

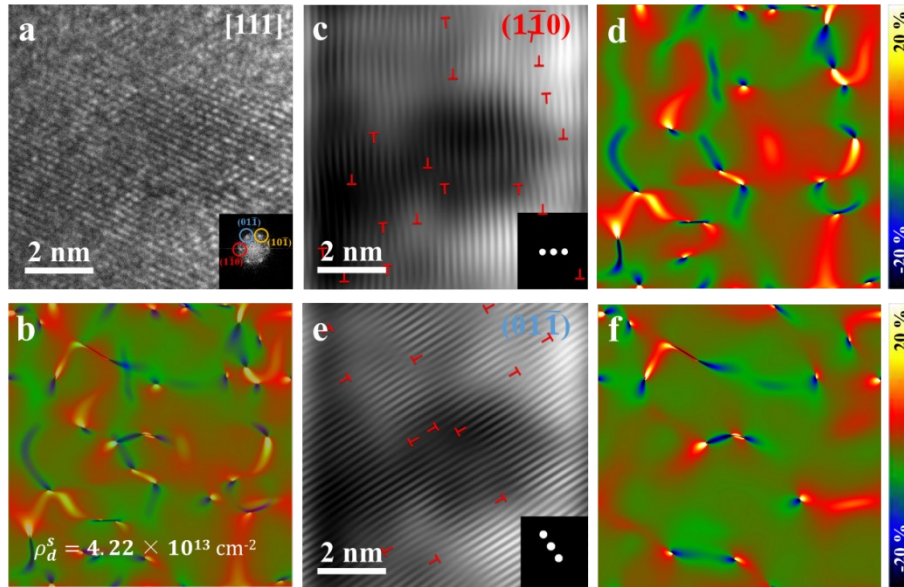

**Supplementary Figure 9.** **a** HR-TEM image of the D-Ni<sub>3.5</sub>Pd nanoparticles (removed from the D-Ni<sub>3.5</sub>Pd/NF electrode after long-term test by ultrasonication) along [111] zone axis and corresponding electron diffraction pattern by performing FFT on **(a)** ; **b** An overlay of strain components  $\varepsilon_{xx}$  and  $\varepsilon_{yy}$ , superimposed with the HR-TEM image, suggesting a high dislocation density of  $\rho_d^s = 4.22 \times 10^{13} \text{ cm}^{-2}$  on (111) plane. **c** IFFT image corresponding to diffraction spot  $1\bar{1}0$ , showing the ( $1\bar{1}0$ ) plane containing edge dislocations marked with symbol  $\perp$ . **d** Contour plot of the strain component  $\varepsilon_{xx}$  by GPA analysis on **(c)**. The color legend represents different strain, *i.e.*, green to dark blue relates to compressive strain and red to bright yellow corresponds to tensile strain. **e** IFFT image corresponding to diffraction spot  $01\bar{1}$ , showing the ( $01\bar{1}$ ) plane containing edge dislocations marked with symbol  $\perp$ . **h** Contour plot of the strain component  $\varepsilon_{yy}$  by GPA analysis on **(e)**.

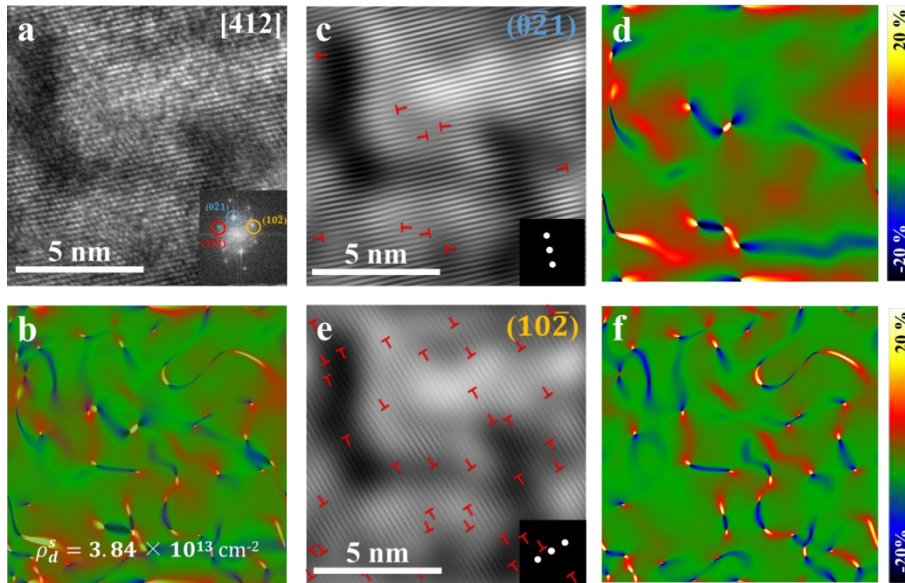

**Supplementary Figure 10.** **a** HR-TEM image of the D-Ni<sub>3.5</sub>Pd nanoparticles (removed from the D-Ni<sub>3.5</sub>Pd/NF electrode after long-term test by ultrasonication) along [412] zone axis and corresponding electron diffraction pattern by performing FFT on **(a)** ; **b** An overlay of strain components  $\epsilon_{xx}$  and  $\epsilon_{yy}$ , superimposed with the HR-TEM image, suggesting a high dislocation density of  $\rho_d^s = 3.84 \times 10^{13} \text{ cm}^{-2}$  on (412) plane. **c** IFFT image corresponding to diffraction spot  $0\bar{2}1$ , showing the  $(0\bar{2}1)$  plane containing edge dislocations marked with symbol  $\perp$ . **d** Contour plot of the strain component  $\epsilon_{xx}$  by GPA analysis on **(c)**. The color legend represents different strain, *i.e.*, green to dark blue relates to compressive strain and red to bright yellow corresponds to tensile strain. **e** IFFT image corresponding to diffraction spot  $10\bar{2}$ , showing the  $(10\bar{2})$  plane containing edge dislocations marked with symbol  $\perp$ . **h** Contour plot of the strain component  $\epsilon_{yy}$  by GPA analysis on **(e)**.

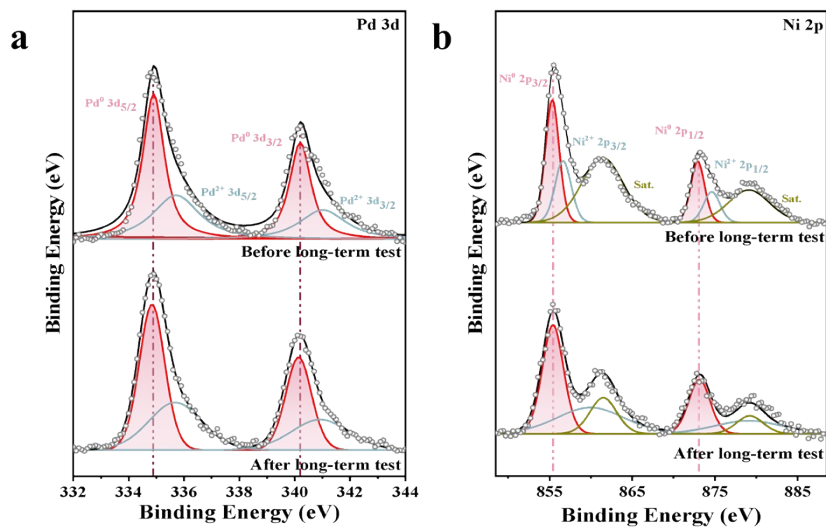

**Supplementary Figure 11.** High-resolution XPS spectra of **a** Pd 3d and **b** Ni 2p of D-Ni<sub>3.5</sub>Pd/NF



electrode before or after long-term test.

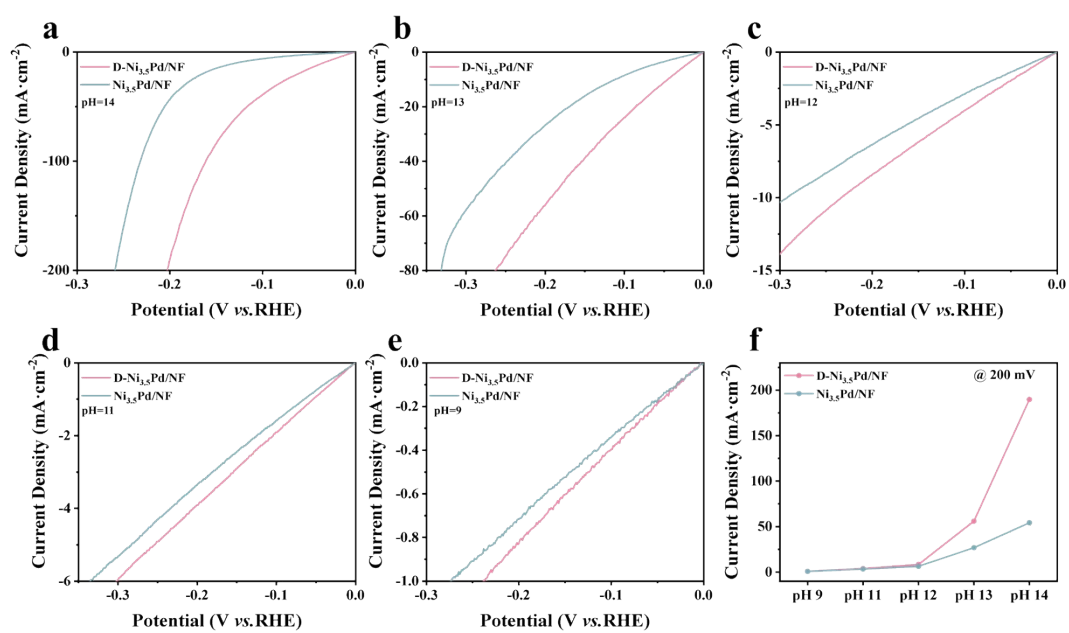

**Supplementary Figure 12.** a-e Polarization curves of D-Ni<sub>3.5</sub>Pd/NF and Ni<sub>3.5</sub>Pd/NF electrodes in alkaline solution of various pH. f The pH-activity curve of D-Ni<sub>3.5</sub>Pd/NF and Ni<sub>3.5</sub>Pd/NF electrodes.

**Supplementary Table 1.** Compositions of electroplating solutions for electrodeposition.

|                         | NiCl <sub>2</sub> ·6H <sub>2</sub> O | PdCl <sub>2</sub> | H <sub>3</sub> BO <sub>3</sub> | NH <sub>4</sub> Cl | CH <sub>3</sub> (CH <sub>2</sub> ) <sub>11</sub> SO <sub>4</sub> N<br>a | pH |
|-------------------------|--------------------------------------|-------------------|--------------------------------|--------------------|-------------------------------------------------------------------------|----|
| Ni <sub>1.6</sub> Pd/NF | 10 mmol/L                            | 5 mmol/L          | 40 mmol/L                      | 25 mmol/L          | 160 mg/L                                                                | 8  |
| Ni <sub>3.5</sub> Pd/NF | 15 mmol/L                            | 5 mmol/L          | 40 mmol/L                      | 25 mmol/L          | 160 mg/L                                                                | 8  |
| Pd/NF                   | 0                                    | 5 mmol/L          | 40 mmol/L                      | 25 mmol/L          | 160 mg/L                                                                | 8  |
| Ni/NF                   | 10 mmol/L                            | 0                 | 40 mmol/L                      | 25 mmol/L          | 160 mg/L                                                                | 8  |

**Supplementary Table 2.** TEM-EDS results of D-Ni<sub>3.5</sub>Pd, Ni<sub>3.5</sub>Pd and Ni<sub>1.6</sub>Pd nanoparticles.

|                           | Element | At(%)    |          |          |          |          |          | Average | Ratio    |
|---------------------------|---------|----------|----------|----------|----------|----------|----------|---------|----------|
|                           |         | Region 1 | Region 2 | Region 3 | Region 4 | Region 5 | Region 6 |         |          |
| D-Ni <sub>3.5</sub> Pd/NF | Ni      | 78.76    | 78.51    | 78.25    | 77.50    | 77.30    | 77.04    | 77.89   | 3.5±0.2: |
|                           | Pd      | 21.24    | 21.49    | 21.75    | 22.50    | 22.70    | 22.96    | 22.11   | 1        |
| Ni <sub>3.5</sub> Pd/NF   | Ni      | 78.35    | 77.97    | 77.83    | 77.30    | 77.12    | 77.01    | 77.59   | 3.5±0.3: |
|                           | Pd      | 21.65    | 22.03    | 22.17    | 22.70    | 22.88    | 22.99    | 22.41   | 1        |
| Ni <sub>1.6</sub> Pd/NF   | Ni      | 62.81    | 61.91    | 60.90    | 61.77    | 61.54    | 61.42    | 62.13   | 1.6±0.1: |
|                           | Pd      | 37.19    | 38.09    | 39.10    | 38.23    | 38.46    | 38.58    | 37.87   | 1        |

**Supplementary Table 3.** Comparison of atomic percentages of Ni and Pd for D-Ni<sub>3.5</sub>Pd, Ni<sub>3.5</sub>Pd and Ni<sub>1.6</sub>Pd nanoparticles determined by XPS measurements.

|                           | Element | At(%) | Ratio |
|---------------------------|---------|-------|-------|
| D-Ni <sub>3.5</sub> Pd/NF | Ni      | 77.92 | 3.5:1 |
|                           | Pd      | 22.08 |       |
| Ni <sub>3.5</sub> Pd/NF   | Ni      | 77.11 | 3.4:1 |
|                           | Pd      | 22.89 |       |
| Ni <sub>1.6</sub> Pd/NF   | Ni      | 59.68 | 1.5:1 |
|                           | Pd      | 40.32 |       |

**Supplementary Table 4.** Dislocation densities on different crystal planes of D-Ni<sub>3.5</sub>Pd nanoparticles.

| <b>Crystal plane</b> | <b>Particle maximum cross-sectional area (nm<sup>2</sup>)</b> | <b>Dislocation number</b> | <b>Dislocation density (cm<sup>-2</sup>)</b> |
|----------------------|---------------------------------------------------------------|---------------------------|----------------------------------------------|
| (111)                | 73.1                                                          | 50                        | 6.84 × 10 <sup>13</sup>                      |
| (412)                | 62.3                                                          | 33                        | 5.23 × 10 <sup>13</sup>                      |
| (100)                | 128.1                                                         | 72                        | 5.62 × 10 <sup>13</sup>                      |

**Supplementary Table 5.** Dislocation densities on different crystal planes of D-Ni<sub>3.5</sub>Pd nanoparticles after long-term test.

| <b>Crystal plane</b> | <b>Particle maximum cross-sectional area (nm<sup>2</sup>)</b> | <b>Dislocation number</b> | <b>Dislocation density (nm<sup>-2</sup>)</b> |
|----------------------|---------------------------------------------------------------|---------------------------|----------------------------------------------|
| (111)                | 71.1                                                          | 30                        | 4.22 × 10 <sup>13</sup>                      |
| (412)                | 119.8                                                         | 46                        | 3.84 × 10 <sup>13</sup>                      |
| (100)                | 65.3                                                          | 19                        | 2.91 × 10 <sup>13</sup>                      |
